# Supplementary material for: C. pseudotuberculosis Phop confers virulence and may be targeted by natural compounds
Source: Royal Society of Chemistry journal article supplement (doi:10.1039/c4ib00140k), 2014-09-12

## Supplementary materials

MANUSCRIPT ID IB-ART-06-2014-000140:

### *C. Pseudotuberculosis* PhoP Provides Virulence And May Be Targeted By Natural Compounds

#### Supplementary figure S1.

Ramachandran plot showing the distribution of amino acid residues and its plot statistics for PhoP protein.

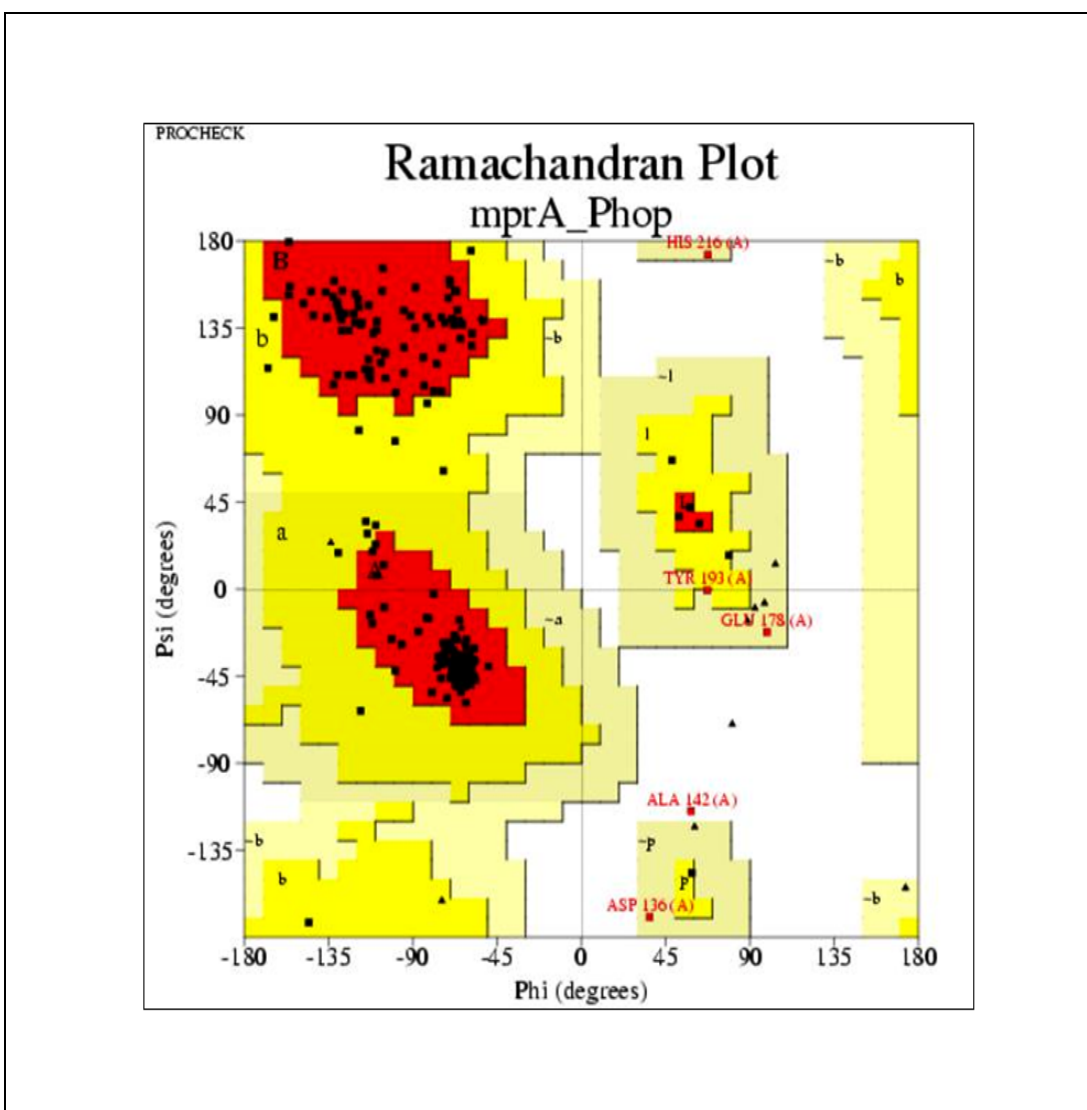

## Supplementary figure S2.

Superimposition of the model protein PhoP and the template protein structure using Chimera program. The modeled PhoP protein shown in Grey and template in Magenta. PhoP superimposition with its template Chain-A, PDB ID: 3R0J-A.

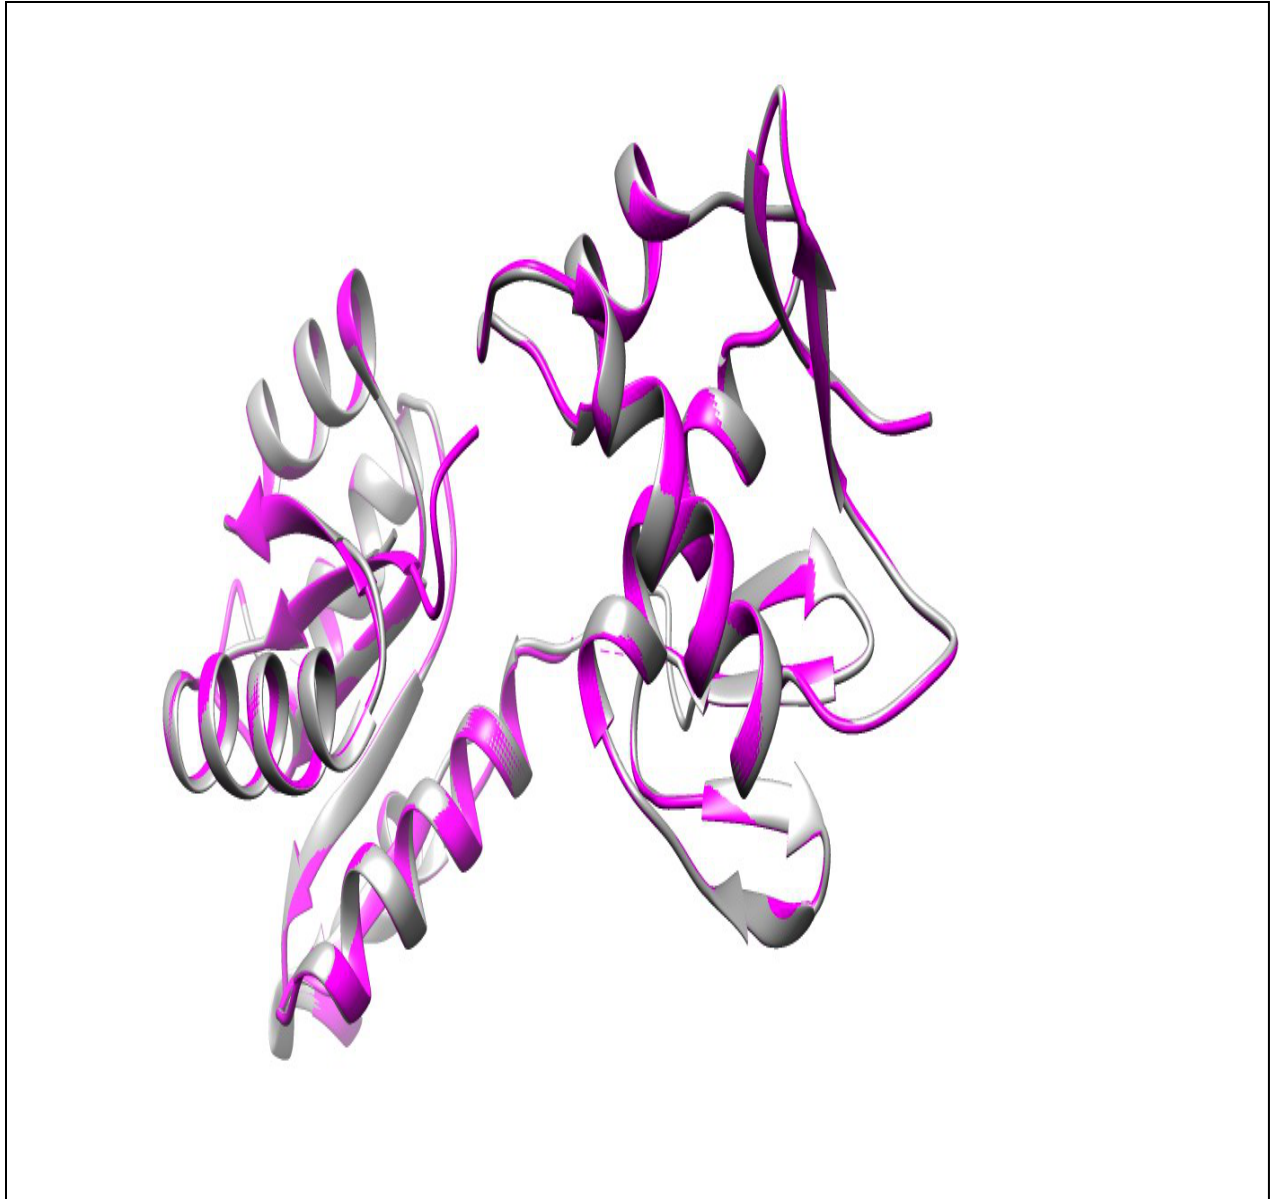

### Supplementary figure S3.

ANOEA and QMEAN6 result for the predicted PhoPR target protein models validation.

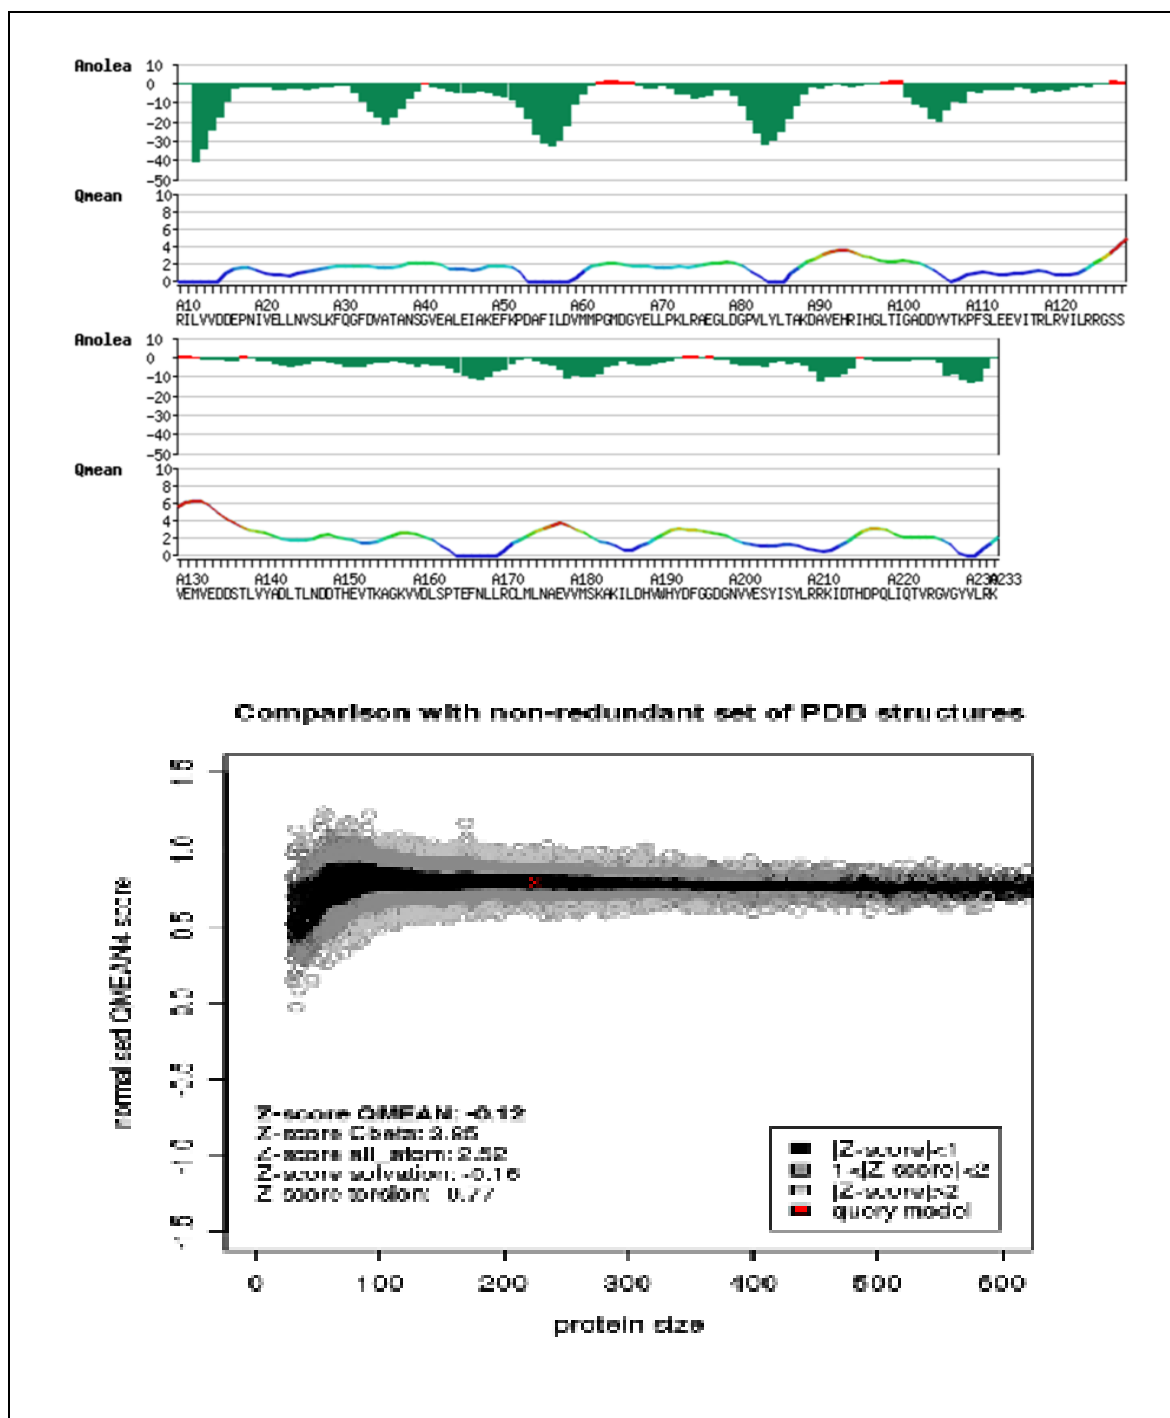

Supplement: c4ib00140k1.pdf [file c4ib00140k1.pdf]
